# Supplementary material for: Inhibition of Notch1-mediated inflammation by intermedin protects against abdominal aortic aneurysm via PI3K/Akt signaling pathway
Source: publisher site journal article supplement (doi:10.18632/aging.202436), 2021-02-01
Supplement: Supplementary file [file aging-v13i4-202436-supplementary-material-SD1.pdf]

## SUPPLEMENTARY FIGURES

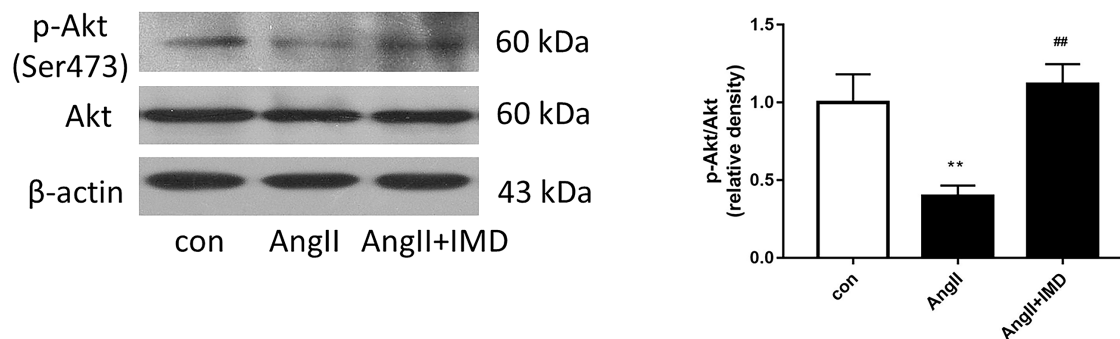

**Supplementary Figure 1. IMD reversed the levels of Akt phosphorylation in AngII-induced Raw264.7 macrophages.** Western blot analysis of Akt phosphorylation (p-Akt) in AngII-treated Raw264.7 macrophage. n=3, Data are mean  $\pm$  SD. \*\* $P$ <0.01 vs. Control. ## $P$ <0.01 vs. AngII.

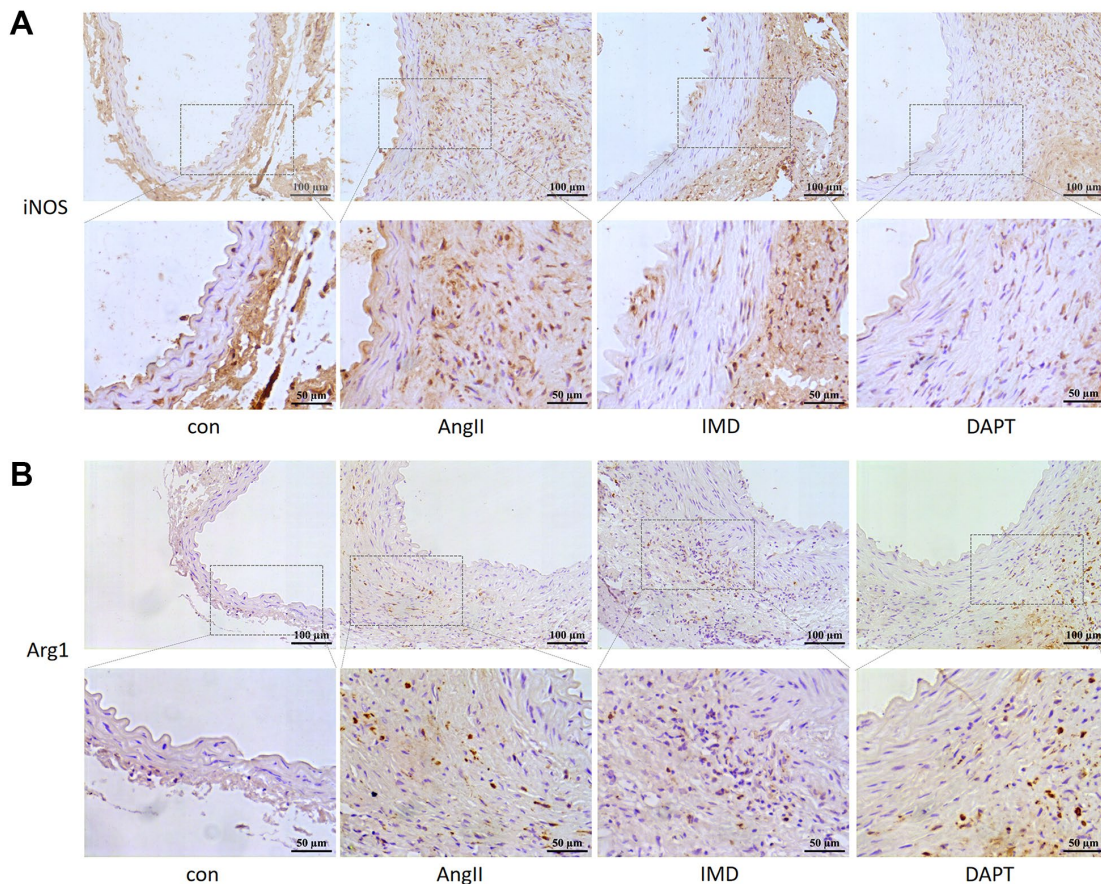

**Supplementary Figure 2. IMD inhibited macrophage polarization *in vivo*.** (A, B) Immunohistochemistry of the protein expression of iNOS and Arg1 in aortas of mice. Scale bar, 100  $\mu$ m, 50  $\mu$ m. Boxes and arrows show enlarged areas.
